# Supplementary material
Source: publisher site journal article supplement (https://www.dovepress.com/article/270684)
Supplement: Supplementary file 1 [file get_supplementary_file.php]

**Supplemental Table 1** **Characteristics of various arrhythmias among different groups according to the severity of OSA**

| Variable | None OSA (n=67) | Mild OSA (n=45) | Moderate OSA (n=24) | Severe OSA (n=15) | p |
| --- | --- | --- | --- | --- | --- |
| **Isolated PVC, n** | **4 (6.0%)** | **11 (24.4%)** | **6 (25.0%)** | **7 (46.7%)** | **0.028** |
| Total umbers, 24 hours | 506.5 (179.3-4759.3) | 400.0 (294.0-1377.8) | 367.0 (154.5-4130.8) | 251.0 (128.0-600.0) | 0.97 |
| Rate fastest run, beats/min | 104.3±13.8 | 97.1±24.3 | 115.5±19.2 | 98.6±26.7 | 0.44 |
| Frequency, per/hour | 21.1 (7.5-198.3) | 16.7 (12.3-57.4) | 8.8 (6.4-172.1) | 10.5 (5.3-25.0) | 0.97 |
| **Paired PVC, n** | **13 (19.4%)** | **13 (28.9%)** | **11 (45.8%)** | **7 (46.7%)** | **0.036** |
| Total umbers, 24 hours | 2.0 (2.0-4.0) | 4.0 (2.0-14.0) | 4.0 (2.0-33.0) | 15.0 (5.0-77.5) | 0.42 |
| Rate fastest run, beats/min | 83.5±21.7 | 83.7±22.3 | 92.3±24.4 | 91.4±22.7 | 0.70 |
| **Ventricular** [**bigeminy**](javascript:;)**, n** | **6 (9.0%)** | **11 (24.4%)** | **5 (20.8%)** | **7 (46.7%)** | **0.005** |
| Total umbers, 24 hours | 7.4±2.6 | 8.7±5.1 | 18.4±7.8 | 39.4±18.6 | p<0.001 |
| Rate fastest run, beats/min | 80.5±9.2 | 91.9±14.4 | 103.4±17.4 | 118.7±32.9 | 0.01 |
| Number of beats longest run, beats | 3.8±1.2 | 4.3±3.1 | 10.6±5.4 | 18.7±8.4 | p<0.001 |
| **Ventricular Trigeminy, n** | **3 (4.5%)** | **6 (13.3%)** | **6 (25.0%)** | **7 (46.7%)** | **<0.001** |
| Total umbers, 24 hours | 8.5 (4.3-9.8) | 29.5 (11.5-42.3) | 37.5 (29.3-71.3) | 81.0 (56.0-123.0) | 0.042 |
| Rate fastest run, beats/min | 87.7±9.6 | 88.7±17.7 | 99.3±19.4 | 107.1±24.3 | 0.34 |
| Number of beats longest run, beats | 3.7±2.1 | 11.3±10.7 | 14.5±10.1 | 25.0±14.9 | 0.05 |
| **Isolated PAC, n** | **9 (13.4%)** | **7 (15.6%)** | **8 (33.3%)** | **6 (40.0%)** | **0.032** |
| Number of runs, 24 hours | 678.5 (196.5-1993.3) | 333.0 (164.5-555.0) | 318.0 (243.5-380.8) | 376.0 (265.3-3141.3) | 0.478 |
| Rate fastest run, beats/min | 101.7±28.9 | 110.1±22.2 | 110.9±28.9 | 120.2±20.9 | 0.612 |
| Frequency, per/hour | 28.3 (8.2-83.1) | 13.8 (6.9-23.1) | 13.3 (10.1-15.9) | 15.7 (11.1-130.9) | 0.478 |
| **NSVT, n** | **8 (11.9%)** | **7 (15.6%)** | **8 (33.3%)** | **8 (53.3%)** | **0.001** |
| Number of runs, 24 hours | 1.0 (1.0-2.0) | 1.0 (1.0-2.0) | 1.5 (1.0-3.5) | 1.0 (1.0-6.8) | 0.51 |
| Rate fastest run, beats/min | 115.5±13.1 | 127.1±16.9 | 131.5±26.7 | 138.8±38.2 | 0.35 |
| Longest duration of runs, seconds | 3.0 (1.9-3.8) | 3.6 (3.1-13.2) | 4.0 (3.2-7.3) | 7.2 (3.2-16.6) | 0.13 |
| Number of beats longest run, beats | 3.3 (5.5-6.8) | 8.0 (6.0-29.0) | 7.0 (7.0-14.5) | 14.0 (6.5-30.8) | 0.05 |
| **SVT, n** | **14 (20.9%)** | **18 (40.0%)** | **10 (41.7%)** | **8 (53.3%)** | **0.029** |
| Number of runs, 24 hours | 8.5 (2.8-18.3) | 8.0 (5.0-10.3) | 5.5 (1.8-13.5) | 3.0 (1.3-27.3) | 0.79 |
| Rate fastest run, beats/min | 133.4±16.1 | 128.8±17.3 | 129.1±15.6 | 126.0±17.4 | 0.76 |
| Longest duration of runs, seconds | 3.8 (3.1-10.7) | 6.4 (2.7-11.1) | 3.8 (2.2-11.1) | 5.6 (3.0-6.8) | 0.56 |
| Number of beats longest run, beats | 8.0 (6.8-11.8) | 11.0 (4.5-21.3) | 7.0 (4.5-25.3) | 9.5 (5.8-14.0) | 0.87 |

OSA=obstructive sleep apnea; PVC=[premature](javascript:;) [ventricular](javascript:;) [contraction](javascript:;); NSVT=non-sustained ventricular tachycardia; PAC=premature atrial contraction; SVT= supraventricular tachycardia.
